# Supplementary material for: Cost-effectiveness analysis of laparoscopic and open surgery in routine Swedish care for colorectal cancer
Source: Springer Nature journal article supplement (doi:10.1007/s00464-019-07214-x), 2019-10-17
Supplement: MOESM1 [file 17291530]

## Supplementary material

### Diagnoses related to colorectal cancer

A04, A08, A09, A41, C10, C16, C17, C18, C19, C20, C21, C25, C26, C34, C48, C50, C53, C54, C56, C57, C64, C67, C71, C76, C77, C78, C79, C80, D01, D12, D36, D37, D38, D39, D40, D41, D44, D48, D50, D52, D62, D63, D64, F32, F33, F39, F41, F43, G47, G62, H91, I21, I26, I46, I67, I80, J18, K25, K29, K40, K43, K45, K46, K50, K51, K52, K56, K58, K59, K60, K61, K62, K63, K64, K65, K91, K92, L30, N17, N18, N30, N32, R06, R10, R19, R20, R31, R33, R42, R50, R52, R53, R68, R94, S36, S37, T78, T81, T92, T98, W19, Z03, Z08, Z42, Z43, Z51, Z54, Z65, Z73, Z80, Z85, Z86, Z93

NOMESCO-chapters for inpatient resource use: J, KB, KC, KD, TJ, UJ and XJ.

Cost per type of NOMESCO-chapter available from the author.
